# Supplementary material
Source: HighWire-hosted journal article supplement (https://cmajopen.ca/highwire/filestream/80890/field_highwire_adjunct_files/0/open-2016-0050-1-at.pdf)
Supplement: open-2016-0050-1-at.pdf [file open-2016-0050-1-at.pdf]

**Appendix 1 (as supplied by the authors):** Percentage reporting influenza immunization within the prior twelve months 2006-07 to 2013-14 influenza seasons, by additional characteristics

|                                       | %    | 2006-07         | 2007-08         | 2008-09         | 2009-10         | 2010-11         | 2011-12         |
|---------------------------------------|------|-----------------|-----------------|-----------------|-----------------|-----------------|-----------------|
| <b>Educational attainment</b>         |      |                 |                 |                 |                 |                 |                 |
| Some secondary                        | 19.7 | 36              | 32              | 31              | 29              | 33              | 30              |
| Secondary                             | 16.4 | 30              | 27              | 27              | 25              | 26              | 27              |
| Some post-secondary                   | 7.0  | 25              | 24              | 25              | 20              | 21              | 20              |
| Post-secondary                        | 54.3 | 31              | 30              | 31              | 25              | 28              | 28              |
| Not stated                            | 2.7  | 33              | 35              | 34              | 27              | 29              | 30              |
| <b>Marital status</b>                 |      |                 |                 |                 |                 |                 |                 |
| Single                                | 29.5 | 21              | 20              | 20              | 17              | 20              | 18              |
| Separated/widowed/divorced            | 12.2 | 44              | 41              | 41              | 36              | 40              | 39              |
| Married/common-law                    | 58.4 | 34              | 32              | 33              | 27              | 30              | 31              |
| <b>Immigration status</b>             |      |                 |                 |                 |                 |                 |                 |
| Canadian-born                         | 76.9 | 31              | 29              | 29              | 25              | 28              | 27              |
| Long-term resident ( $\geq 11$ years) | 16.4 | 40              | 36              | 36              | 30              | 33              | 33              |
| Recent immigrant ( $< 10$ years)      | 6.7  | 26              | 25              | 23              | 18              | 18              | 20              |
| <b>Racial or cultural group</b>       |      |                 |                 |                 |                 |                 |                 |
| White                                 | 76.2 | 32              | 30              | 30              | 26              | 29              | 28              |
| Black*                                | 2.4  | 32              | 26              | 22              | 20              | 26              | 21              |
| Korean*                               | 0.4  | 31 <sup>E</sup> | 33 <sup>E</sup> | 31 <sup>E</sup> | 27 <sup>E</sup> | 32 <sup>E</sup> | F               |
| Filipino*                             | 1.6  | 44              | 39              | 39              | 31              | 37              | 30              |
| Japanese*                             | 0.2  | 24 <sup>E</sup> | 31 <sup>E</sup> | 59              | 38 <sup>E</sup> | 36 <sup>E</sup> | 40 <sup>E</sup> |
| Chinese                               | 3.4  | 34              | 32              | 34              | 27              | 27              | 31              |
| South Asian                           | 3.8  | 31              | 33              | 31              | 29              | 28              | 28              |
| Southeast Asian*                      | 0.9  | 39              | 31              | 29              | 26              | 27              | 28 <sup>E</sup> |
| Arab*                                 | 1.0  | 31              | 21 <sup>E</sup> | 19 <sup>E</sup> | 14 <sup>E</sup> | 16 <sup>E</sup> | 11 <sup>E</sup> |
| West Asian*                           | 0.6  | 25 <sup>E</sup> | 31 <sup>E</sup> | 25 <sup>E</sup> | F               | 13 <sup>E</sup> | 30 <sup>E</sup> |
| Latin American                        | 1.3  | 25              | 20              | 24              | 22 <sup>E</sup> | 16 <sup>E</sup> | 22 <sup>E</sup> |
| Aboriginal                            | 3.4  | 26              | 26              | 27              | 23              | 26              | 23              |
| Multiple*                             | 1.1  | 31              | 31              | 27              | 22 <sup>E</sup> | 21              | 23              |
| Other*                                | 0.7  | 26 <sup>E</sup> | 19 <sup>E</sup> | 31 <sup>E</sup> | 16 <sup>E</sup> | 20 <sup>E</sup> | 17 <sup>E</sup> |
| Not stated                            | 2.9  | 35              | 32              | 33              | 27              | 29              | 29              |
| <b>Self-reported health status</b>    |      |                 |                 |                 |                 |                 |                 |
| Poor                                  | 2.5  | 53              | 46              | 47              | 44              | 47              | 44              |
| Fair*                                 | 8.3  | 47              | 43              | 43              | 38              | 40              | 38              |
| Good/very good/excellent              | 89.2 | 30              | 28              | 28              | 24              | 27              | 26              |
| <b>Body mass index category</b>       |      |                 |                 |                 |                 |                 |                 |
| Normal/underweight ( $\leq 24.9$ )    | 48.7 | 29              | 27              | 27              | 23              | 26              | 25              |
| Overweight (25.0-29.9)                | 31.7 | 35              | 32              | 31              | 26              | 30              | 29              |
| Obese ( $\geq 30.0$ )                 | 16.7 | 36              | 34              | 36              | 30              | 33              | 33              |
| Not stated                            | 2.9  | 32              | 31              | 30              | 30              | 31              | 29              |
| Child $< 5$ years of age in household | 13.1 | 25              | 24              | 23              | 20              | 22              | 22              |
| <b>Smoking</b>                        |      |                 |                 |                 |                 |                 |                 |
| Never                                 | 42.1 | 32              | 30              | 30              | 26              | 29              | 27              |
| Former                                | 37.5 | 37              | 34              | 35              | 30              | 32              | 33              |
| Daily/occasional                      | 20.4 | 22              | 22              | 21              | 17              | 20              | 19              |

|                      |      |     |     |     |    |    |    |
|----------------------|------|-----|-----|-----|----|----|----|
| Has a regular doctor |      |     |     |     |    |    |    |
| Yes                  | 84.7 | 35  | 33  | 33  | 28 | 31 | 31 |
| No                   | 15.3 | 14  | 14  | 14  | 10 | 12 | 11 |
| Place of residence   |      |     |     |     |    |    |    |
| Urban                | 81.9 | 32  | 30  | 30  | 26 | 28 | 28 |
| Rural                | 18.1 | 31  | 29  | 29  | 25 | 28 | 27 |
| Pharmacist Policy    |      |     |     |     |    |    |    |
| Yes                  | 27.9 | n/a | n/a | n/a | 29 | 29 | 29 |
| No*                  | 72.1 | 32  | 30  | 30  | 25 | 28 | 27 |

\*Changed by  $\geq 5$  percentage points over the study period. Due to high sampling variability, estimates denoted with <sup>E</sup> should be interpreted with caution as the respective coefficient of variation is between 16.6% and 33.3%. Estimates with a coefficient of variation above 33.3% (F) are not reported as they may be unreliable and do not meet Statistics Canada's quality standards.
